# Supplementary material
Source: HighWire-hosted journal article supplement (https://cmaj.ca/highwire/filestream/71496/field_highwire_adjunct_files/0/181442-five-1-at.pdf)
Supplement: 181442-five-1-at.pdf [file 181442-five-1-at.pdf]

## References

1. Information for Canadians regarding reports of acute flaccid myelitis (AFM). Ottawa: Public Health Agency of Canada; 2018 Oct. 23; modified 2018 Nov. 13. Available: [www.canada.ca/en/public-health/services/diseases/acute-flaccid-myelitis.html](http://www.canada.ca/en/public-health/services/diseases/acute-flaccid-myelitis.html) (accessed 2018 Nov. 19).
2. AFM investigation. Atlanta: US Centers for Disease Control and Prevention; reviewed 2018 Apr. 2; updated 2018 Nov. 14. Available: [www.cdc.gov/acute-flaccid-myelitis/afm-surveillance.html](http://www.cdc.gov/acute-flaccid-myelitis/afm-surveillance.html) (accessed 2018 Nov. 19).
3. Messacar K, Schreiner TL, Van Haren K, et al. Acute flaccid myelitis: a clinical review of US cases 2012–2015. *Ann Neurol* 2016;80:326–38.
4. Bitnun A, Yeh EA. Acute flaccid paralysis and enteroviral infections. *Curr Infect Dis Rep* 2018;20:34.
5. Sejvar JJ, Lopez AS, Cortese MM, et al. Acute flaccid myelitis in the United States, August–December 2014: results of nationwide surveillance. *Clin Infect Dis* 2016;63:737–45.
6. Standardized case definition for acute flaccid myelitis. Atlanta: Council of State and Territorial Epidemiologists; 2015. Available: <https://c.ymcdn.com/sites/www.cste.org/resource/resmgr/2015PS/2015PSFinal/15-ID-01.pdf> (accessed 2018 Oct. 26).
7. Messacar K, Asturias EJ, Hixon AM, et al. Enterovirus D68 and acute flaccid myelitis—evaluating the evidence for causality. *Lancet Infect Dis* 2018;18:e239–47.
8. Yea C, Bitnun A, Robinson J, et al. Longitudinal outcomes in the 2014 Acute Flaccid Paralysis Cluster in Canada. *J Child Neurol* 2017;32:301–7.
